# Supplementary material
Source: PubMed Central journal article supplement (PMC7669715)

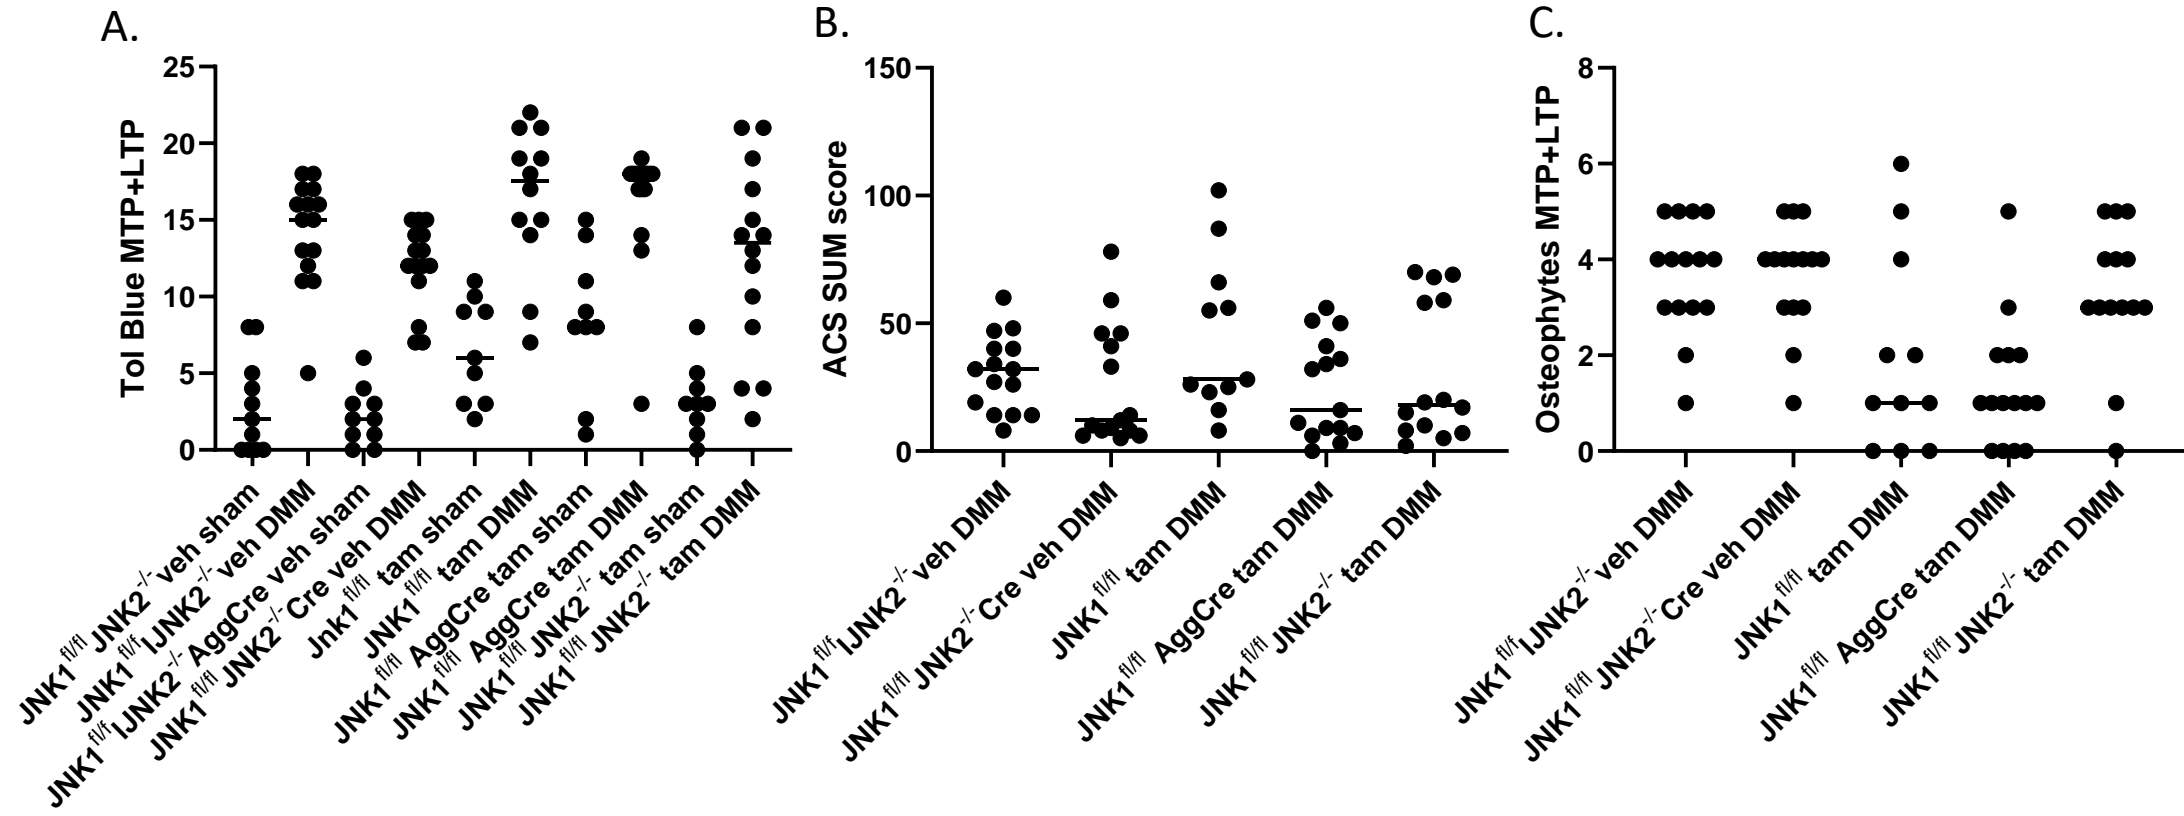

Supplement: NIHMS1605433-supplement-Supp_FigS1.pdf [file NIHMS1605433-supplement-Supp_FigS1.pdf]

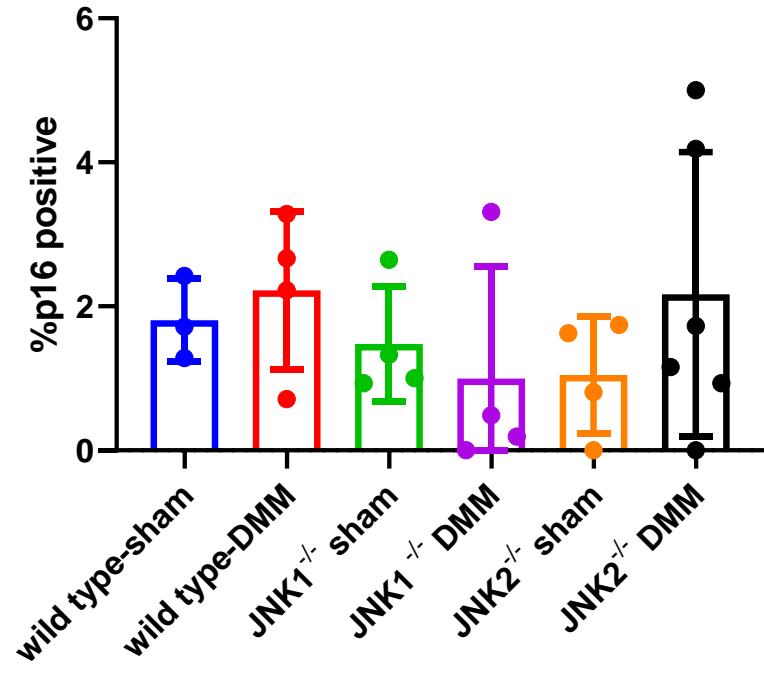

Supplement: NIHMS1605433-supplement-Supp_FigS2.pdf [file NIHMS1605433-supplement-Supp_FigS2.pdf]
